# Supplementary material for: Antibacterial and Oxidative Stress-Protective Effects of Five Monoterpenes from Softwood
Source: MDPI journal article supplement (doi:10.3390/molecules27123891), 2022-06-17
Supplement: s1 [file s1]

**SUPPLEMENTARY DATA: ANTIBACTERIAL AND OXIDATIVE STRESS-PROTECTIVE EFFECTS OF FIVE MONOTERPENES FROM SOFT WOOD**

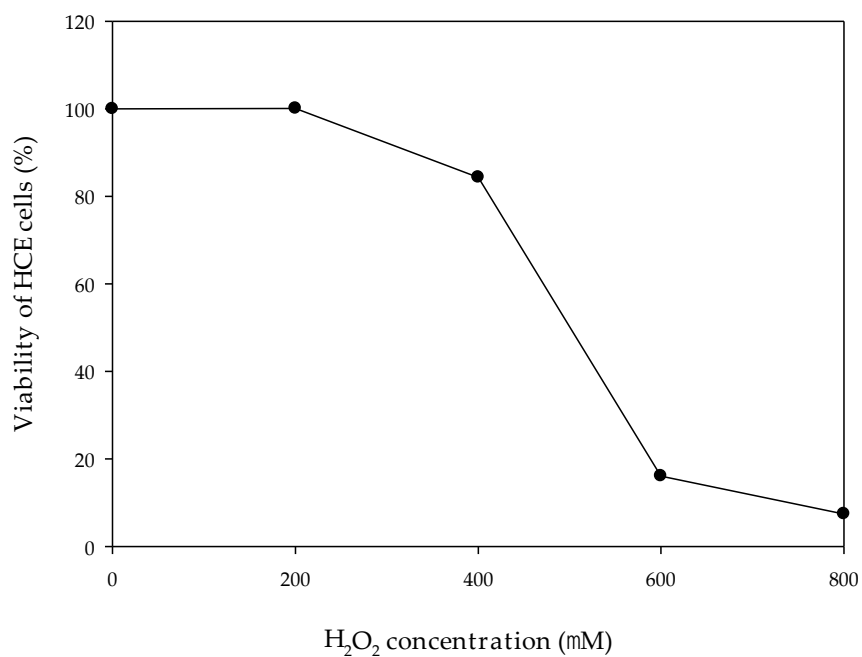

**Supplementary Figure S1.** Effect of hydrogen peroxide (H<sub>2</sub>O<sub>2</sub>) on HCE cell viability. Content of 800  $\mu$ M H<sub>2</sub>O<sub>2</sub> killed the cells and was selected for further studies.

**SUPPLEMENTARY DATA: ANTIBACTERIAL AND OXIDATIVE STRESS-PROTECTIVE EFFECTS OF FIVE MONOTERPENES FROM SOFT WOOD**

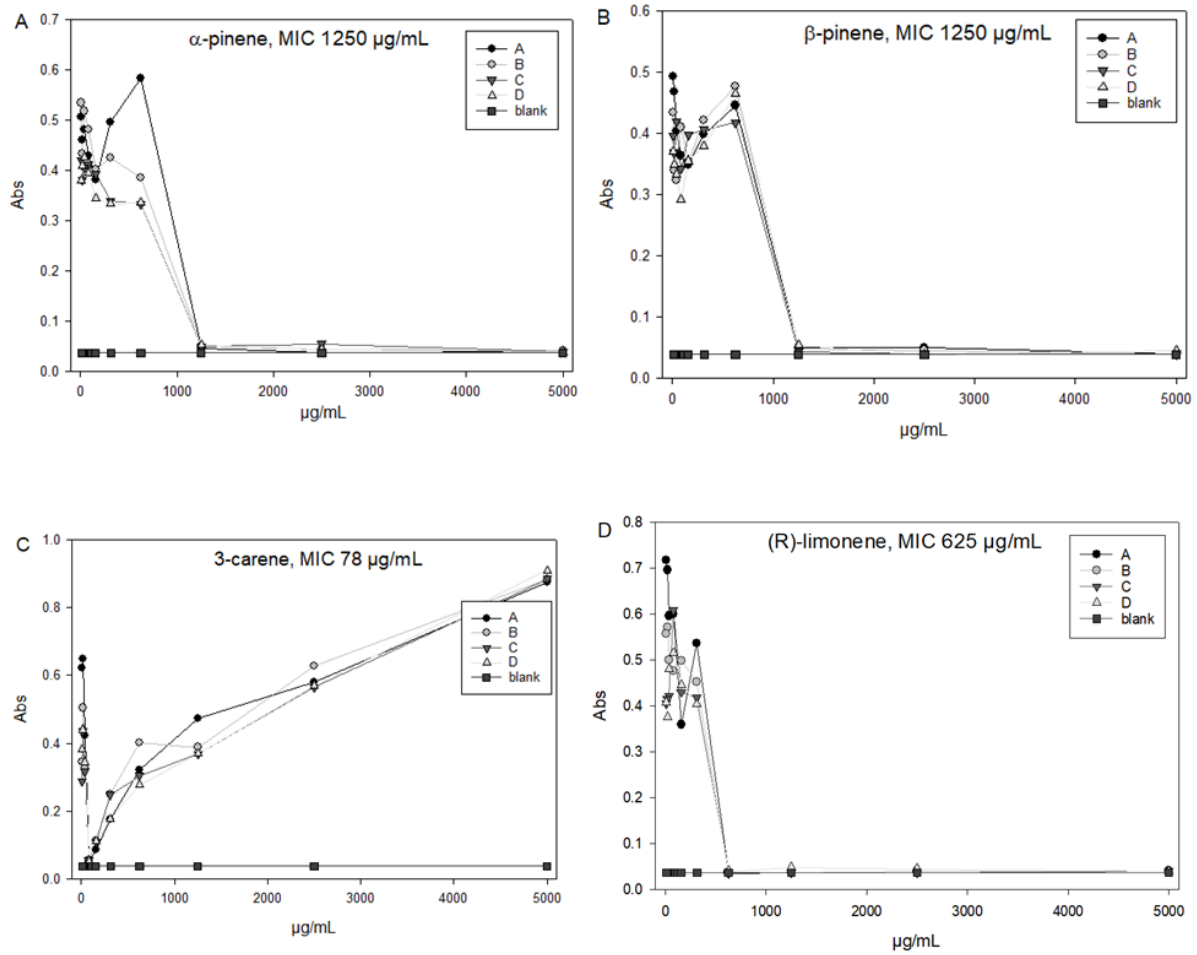

**Supplementary Figure S2.** MIC test indicated that for  $\alpha$ -pinene,  $\beta$ -pinene, 3-carene and R-limonene the bacterial growth inhibiting contents were > 1.25 mg/mL, > 1.25 mg/mL, > 0.078 mg/mL, > 0.63 mg/mL against *E. coli*, respectively.

**SUPPLEMENTARY DATA: ANTIBACTERIAL AND OXIDATIVE STRESS-PROTECTIVE EFFECTS OF FIVE MONOTERPENES FROM SOFT WOOD**

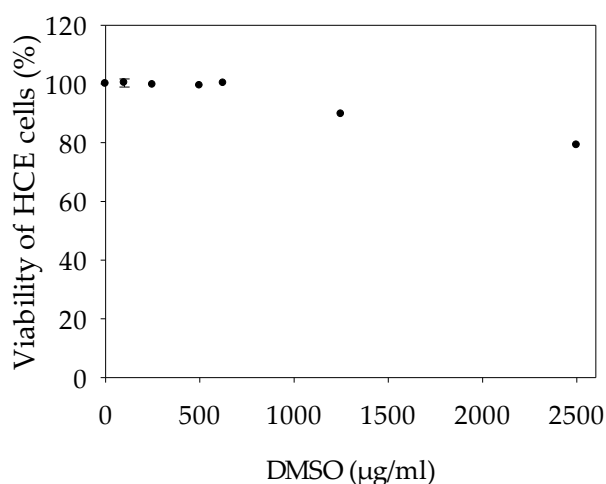

**Supplementary Figure S3.** Effect of DMSO on HCE cell viability: Terpenes were dissolved in dimethyl sulfoxide (DMSO), which is cytotoxic in high concentrations. The effect of DMSO on HCE cells was tested using terpene dilutions' DMSO concentrations. Lower than 1000 µg/mL DMSO at terpene dilutions had no effect on cell viability.

**Supplementary Table S1.** Comparisons between the Oxygen Radical Absorbance Capacity (ORAC) of five terpenes analyzed by one-way variance analysis (ANOVA) and Tukey's multiple comparisons of mean. ORAC-values of 3-carene and S-limonene were on higher level compared to  $\alpha$ - and  $\beta$ -pinenes and R-limonene.

| Terpene pair                       | Estimate | Std.Error | t-value | Pr(> t )   |
|------------------------------------|----------|-----------|---------|------------|
| $\beta$ -pinene - $\alpha$ -pinene | 936.6    | 4773.6    | 0.196   | 1.000      |
| 3-carene - $\alpha$ -pinene        | 38438.6  | 4465.3    | 8.608   | <1e-04 *** |
| S-limonene - $\alpha$ -pinene      | 48671.1  | 4773.6    | 10.196  | <1e-04 *** |
| R-limonene - $\alpha$ -pinene      | 6996.8   | 4465.3    | 1.567   | 0.542      |
| 3-carene - $\beta$ -pinene         | 37502.0  | 4465.3    | 8.399   | <1e-04 *** |
| S-limonene - $\beta$ -pinene       | 47734.5  | 4773.6    | 10.000  | <1e-04 *** |
| R-limonene - $\beta$ -pinene       | 6060.2   | 4465.3    | 1.357   | 0.663      |
| S-limonene - 3-carene              | 10232.5  | 4465.3    | 2.292   | 0.212      |
| R-limonene - 3-carene              | -31441.8 | 4134.0    | -7.606  | <1e-04 *** |
| R-limonene - S-limonene            | -41674.3 | 4465.3    | -9.333  | <1e-04 *** |

Signif. codes: 0 '\*\*\*' 0.001 '\*\*' 0.01 '\*' 0.05 '.' 0.1 ' ' 1

**SUPPLEMENTARY DATA: ANTIBACTERIAL AND OXIDATIVE STRESS-PROTECTIVE EFFECTS OF FIVE MONOTERPENES FROM SOFT WOOD**

**Supplementary Table S2. Comparisons between the effects of three different  $\alpha$ -pinene concentrations, 6.3% DMSO and water treatment on light production of *E. coli* K12+pcGLS11 strain after 50 min incubation analyzed by one-way variance analysis (ANOVA) and Tukey's multiple mean comparisons. After 50min incubation time there was a difference in light production between all treatments.**

| $\alpha$ -pinene (mg/ml) | Estimate (RLU) | Std.Error | t-value | Pr(> t )     |
|--------------------------|----------------|-----------|---------|--------------|
| 1.6 – 3.2                | 48036600       | 1068208   | 44.969  | < 1e-04 ***  |
| 0.8 – 3.2                | 57998500       | 1068208   | 54.295  | < 1e-04 ***  |
| dmso – 3.2               | 39609667       | 1068208   | 37.080  | < 1e-04 ***  |
| water – 3.2              | 67671367       | 1068208   | 63.350  | < 1e-04 ***  |
| 0.8 – 1.6                | 9961900        | 1068208   | 9.326   | < 1e-04 ***  |
| dmso – 1.6               | -8426933       | 1068208   | -7.889  | 0.000113 *** |
| water – 1.6              | 19634767       | 1068208   | 18.381  | < 1e-04 ***  |
| dmso – 0.8               | -18388833      | 1068208   | -17.215 | < 1e-04 ***  |
| water – 0.8              | 9672867        | 1068208   | 9.055   | < 1e-04 ***  |

Signif. codes: 0 '\*\*\*' 0.001 '\*\*' 0.01 '\*' 0.05 '.' 0.1 ' ' 1

**Supplementary Table S3. Comparisons between the effects of three different  $\beta$ -pinene concentrations, 6.3% DMSO and water treatment on light production of *E. coli* K12+pcGLS11 strain after 50 min incubation analyzed by one-way variance analysis (ANOVA) and Tukey's multiple mean comparisons. Contents 0.8 and 1.6 mg/ml of  $\beta$ -pinene did not vary from each other's and 3.2 mg/ml content was as effective as DMSO treatment.**

| $\beta$ -pinene (mg/ml) | Estimate (RLU) | Std.Error | t-value | Pr(> t )     |
|-------------------------|----------------|-----------|---------|--------------|
| 1.6 – 3.2               | 21188767       | 1822588   | 11.626  | < 1e-04 ***  |
| 0.8 – 3.2               | 20446167       | 1822588   | 11.218  | < 1e-04 ***  |
| dmso – 3.2              | 4631333        | 1822588   | 2.541   | 0.156699     |
| water – 3.2             | 32693033       | 1822588   | 17.938  | < 1e-04 ***  |
| 0.8 – 1.6               | -742600        | 1822588   | -0.407  | 0.993268     |
| dmso – 1.6              | -16557433      | 1822588   | -9.085  | < 1e-04 ***  |
| water – 1.6             | 11504267       | 1822588   | 6.312   | 0.000574 *** |
| dmso – 0.8              | -15814833      | 1822588   | -8.677  | < 1e-04 ***  |
| water – 0.8             | 12246867       | 1822588   | 6.719   | 0.000369 *** |

Signif. codes: 0 '\*\*\*' 0.001 '\*\*' 0.01 '\*' 0.05 '.' 0.1 ' ' 1

**SUPPLEMENTARY DATA: ANTIBACTERIAL AND OXIDATIVE STRESS-PROTECTIVE EFFECTS OF FIVE MONOTERPENES FROM SOFT WOOD**

**Supplementary Table S4. Comparisons between the effects of three different 3-Carene concentrations, 6.3% DMSO and water treatment on light production of *E. coli* K12+pcGLS11 strain after 50 min incubation analyzed by one-way variance analysis (ANOVA) and Tukey's multiple mean comparisons. The three 3-carene concentrations did not vary from each other's after 50 min incubation.**

| 3-carene (mg/ml) | Estimate (RLU) | Std.Error | t-value | Pr(> t )   |
|------------------|----------------|-----------|---------|------------|
| 1.6 – 3.2        | -88813         | 392803    | -0.226  | 0.999      |
| 0.8 – 3.2        | -45051         | 392803    | -0.115  | 1.000      |
| dmso – 3.2       | 62749968       | 392803    | 159.749 | <1e-06 *** |
| water – 3.2      | 90811668       | 392803    | 231.189 | <1e-06 *** |
| 0.8 – 1.6        | 43762          | 392803    | 0.111   | 1.000      |
| dmso – 1.6       | 62838781       | 392803    | 159.975 | <1e-06 *** |
| water – 1.6      | 90900481       | 392803    | 231.415 | <1e-06 *** |
| dmso – 0.8       | 62795019       | 392803    | 159.864 | <1e-06 *** |
| water – 0.8      | 90856719       | 392803    | 231.304 | <1e-06 *** |

Signif. codes: 0 '\*\*\*' 0.001 '\*\*' 0.01 '\*' 0.05 '.' 0.1 ' ' 1

**Supplementary Table S5. Comparisons between the effects of three different S-limonene concentrations, 6.3% DMSO and water treatment on light production of *E. coli* K12+pcGLS11 strain after 50 min incubation analyzed by one-way variance analysis (ANOVA) and Tukey's multiple mean comparisons. After 50 min of incubation, there were no differences in light production between the three S-limonene concentration treatments.**

| S-limonene (mg/ml) | Estimate (RLU) | Std.Error | t-value | Pr(> t )   |
|--------------------|----------------|-----------|---------|------------|
| 1.6 – 3.2          | 1320           | 393211    | 0.003   | 1.000      |
| 0.8 – 3.2          | 244585         | 393211    | 0.622   | 0.968      |
| dmso – 3.2         | 62847733       | 393211    | 159.832 | <1e-04 *** |
| water – 3.2        | 90909433       | 393211    | 231.198 | <1e-04 *** |
| 0.8 – 1.6          | 243266         | 393211    | 0.619   | 0.969      |
| dmso – 1.6         | 62846413       | 393211    | 159.829 | <1e-04 *** |
| water – 1.6        | 90908113       | 393211    | 231.194 | <1e-04 *** |
| dmso – 0.8         | 62603148       | 393211    | 159.210 | <1e-04 *** |
| water – 0.8        | 90664848       | 393211    | 230.576 | <1e-04 *** |

Signif. codes: 0 '\*\*\*' 0.001 '\*\*' 0.01 '\*' 0.05 '.' 0.1 ' ' 1

**SUPPLEMENTARY DATA: ANTIBACTERIAL AND OXIDATIVE STRESS-PROTECTIVE EFFECTS OF FIVE MONOTERPENES FROM SOFT WOOD**

**Supplementary Table S6. Comparisons between the effects of three different  $\alpha$ -pinene concentrations, 6.3% DMSO and water treatment on light production of *S. aureus* RN4220+pAT19 strain after 50 min incubation analyzed by one-way variance analysis (ANOVA) and Tukey's multiple mean comparisons. After 50min incubation time there was a difference in light production between all treatments.**

| $\alpha$ -pinene (mg/ml) | Estimate (RLU) | Std.Error | t-value | Pr(> t )   |
|--------------------------|----------------|-----------|---------|------------|
| 1.6 – 3.2                | 22576          | 1183      | 19.083  | <0.001 *** |
| 0.8 – 3.2                | 51981          | 1183      | 43.938  | <0.001 *** |
| dmso – 3.2               | 56125          | 1183      | 47.441  | <0.001 *** |
| water – 3.2              | 101009         | 1183      | 85.380  | <0.001 *** |
| 0.8 – 1.6                | 29406          | 1183      | 24.856  | <0.001 *** |
| dmso – 1.6               | 33549          | 1183      | 28.358  | <0.001 *** |
| water – 1.6              | 78434          | 1183      | 66.298  | <0.001 *** |
| dmso – 0.8               | 4144           | 1183      | 3.503   | 0.036 *    |
| water – 0.8              | 49028          | 1183      | 41.442  | <0.001 *** |

Signif. codes: 0 '\*\*\*' 0.001 '\*\*' 0.01 '\*' 0.05 '.' 0.1 ' ' 1

**Supplementary Table S7. Comparisons between the effects of three different  $\beta$ -pinene concentrations, 6.3% DMSO and water treatment on light production of *S. aureus* RN4220+pAT19 strain after 50 min incubation analyzed by one-way variance analysis (ANOVA) and Tukey's multiple mean comparisons. After 50min incubation time, the  $\beta$ -pinene concentration 3.2 mg/ml inhibited light production more than the two other concentrations (1.6mg/ml and 0.8 mg/ml) and DMSO.**

| $\beta$ -pinene (mg/ml) | Estimate (RLU) | Std.Error | t-value | Pr(> t )    |
|-------------------------|----------------|-----------|---------|-------------|
| 1.6 – 3.2               | 32360          | 2300      | 14.069  | < 0.001 *** |
| 0.8 – 3.2               | 36625          | 2300      | 15.924  | < 0.001 *** |
| dmso – 3.2              | 25616          | 2300      | 11.137  | < 0.001 *** |
| water – 3.2             | 70501          | 2300      | 30.652  | < 0.001 *** |
| 0.8 – 1.6               | 4266           | 2300      | 1.855   | 0.39725     |
| dmso – 1.6              | -6743          | 2300      | -2.932  | 0.08707 .   |
| water – 1.6             | 38141          | 2300      | 16.583  | < 0.001 *** |
| dmso – 0.8              | -11009         | 2300      | -4.786  | 0.00516 **  |
| water – 0.8             | 32360          | 2300      | 14.069  | < 0.001 *** |

Signif. codes: 0 '\*\*\*' 0.001 '\*\*' 0.01 '\*' 0.05 '.' 0.1 ' ' 1

**SUPPLEMENTARY DATA: ANTIBACTERIAL AND OXIDATIVE STRESS-PROTECTIVE EFFECTS OF FIVE MONOTERPENES FROM SOFT WOOD**

**Supplementary Table S8. Comparisons between the effects of three different 3-carene concentrations, 6.3% DMSO and water treatment on light production of *S. aureus* RN4220+pAT19 strain after 50 min incubation analyzed by one-way variance analysis (ANOVA) and Tukey's multiple mean comparisons. After 50min incubation time, all three 3-carene treatments had similar effect on light production.**

| 3-carene (mg/ml) | Estimate | Std.Error | t-value | Pr(> t )   |
|------------------|----------|-----------|---------|------------|
| 1.6 – 3.2        | -337.5   | 418.5     | -0.806  | 0.923      |
| 0.8 – 3.2        | -449.2   | 418.5     | -1.073  | 0.816      |
| dms0 – 3.2       | 57977.5  | 418.5     | 138.535 | <1e-04 *** |
| water – 3.2      | 102861.7 | 418.5     | 245.783 | <1e-04 *** |
| 0.8 – 1.6        | -111.8   | 418.5     | -0.267  | 0.999      |
| dms0 – 1.6       | 58314.9  | 418.5     | 139.341 | <1e-04 *** |
| water – 1.6      | 103199.1 | 418.5     | 246.589 | <1e-04 *** |
| dms0 – 0.8       | 58426.7  | 418.5     | 139.608 | <1e-04 *** |
| water – 0.8      | 103310.9 | 418.5     | 246.857 | <1e-04 *** |

Signif. codes: 0 '\*\*\*' 0.001 '\*\*' 0.01 '\*' 0.05 '.' 0.1 ' ' 1

**Supplementary Table S9. Comparisons between the effects of three different S-limonene concentrations, 6.3% DMSO and water treatment on light production of *S. aureus* RN4220+pAT19 strain after 50 min incubation analyzed by one-way variance analysis (ANOVA) and Tukey's multiple mean comparisons. After 50min incubation time, all three S-limonene treatments had similar effect on light production.**

| S-limonene (mg/ml) | Estimate   | Std.Error | t-value | Pr(> t )   |
|--------------------|------------|-----------|---------|------------|
| 1.6 – 3.2          | -9.878     | 418.497   | -0.024  | 1          |
| 0.8 – 3.2          | 6.528      | 418.497   | 0.016   | 1          |
| dms0 – 3.2         | 58499.176  | 418.497   | 139.784 | <1e-09 *** |
| water – 3.2        | 103383.342 | 418.497   | 247.035 | <1e-09 *** |
| 0.8 – 1.6          | 16.407     | 418.497   | 0.039   | 1          |
| dms0 – 1.6         | 58509.054  | 418.497   | 139.808 | <1e-09 *** |
| water – 1.6        | 103393.221 | 418.497   | 247.059 | <1e-09 *** |
| dms0 – 0.8         | 58492.648  | 418.497   | 139.768 | <1e-09 *** |
| water – 0.8        | 103376.814 | 418.497   | 247.019 | <1e-09 *** |

Signif. codes: 0 '\*\*\*' 0.001 '\*\*' 0.01 '\*' 0.05 '.' 0.1 ' ' 1
